# Supplementary material
Source: publisher figshare collection journal article supplement (https://acs.figshare.com/ndownloader/files/26654646)
Supplement: Supplementary file 1 [file 26654646]

# Investigating the Transition between Polymer Melts and Solutions in Non-linear Elongational Flow

Alexis André<sup>1,2</sup>, Taisir Shahid<sup>1,3</sup>, Filip Oosterlinck<sup>3</sup>, Christian Clasen<sup>2</sup>, Evelyne van Ruymbeke<sup>1,\*</sup>

1. Bio and Soft Matter, Institute on Condensed Matter and Nano-science, Université catholique de Louvain, Louvain-la-Neuve, Belgium.

2. Department of Chemical Engineering, KU Leuven, Celestijnenlaan 200f, 3001 Leuven, Belgium.

3. DSM Materials Science Center, P.O. Box 18, NL-6160 MD Geleen, The Netherlands.

\* [evelyne.vanruymbeke@uclouvain.be](mailto:evelyne.vanruymbeke@uclouvain.be)

## Supplemental Material (SM)

Figure S1

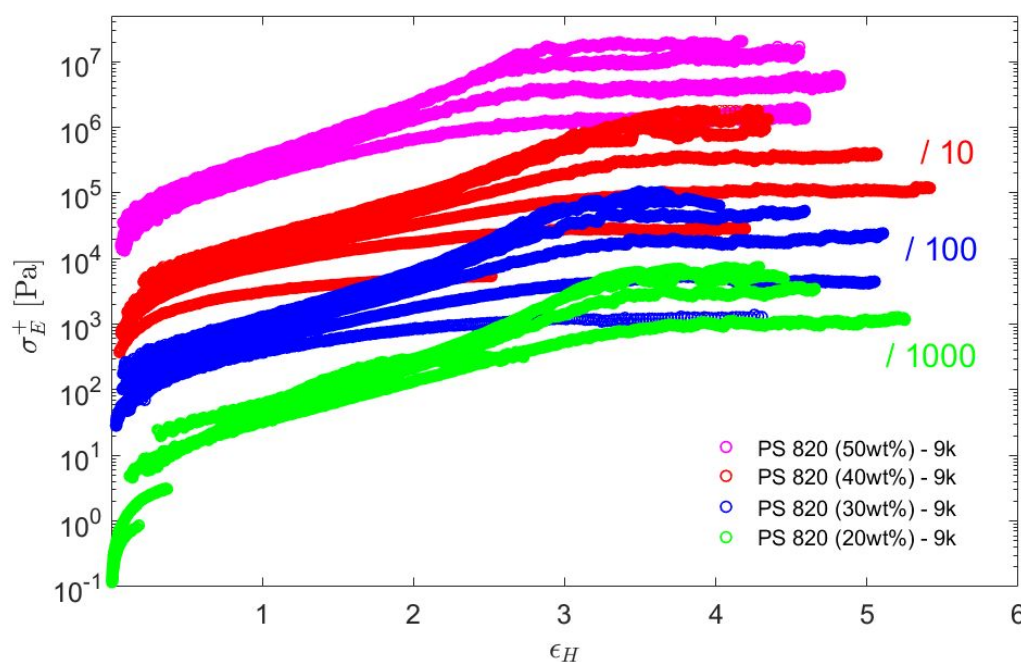

Figure S1: Measured extensional stress as a function of Hencky strain. Data were measured for different strain rates at  $T = 130\text{ }^{\circ}\text{C}$ . The strain rates are from bottom to top:  $0.001, 0.003, 0.01, 0.03, 0.06, 0.09\text{ s}^{-1}$ , except for PS 820k (50 wt%) for which the strain rates are from bottom to top  $0.003, 0.01, 0.03, 0.06\text{ s}^{-1}$ . Additionally, for PS 820k (40 wt%) and PS 820k (20 wt%), LVE envelopes have also been measured in elongational flow at  $0.0001$  and  $0.00003\text{ s}^{-1}$  respectively. For clarity, some of the extensional data has been downshifted by 1, 2 or 3 decades as indicated.

**Figure S2**

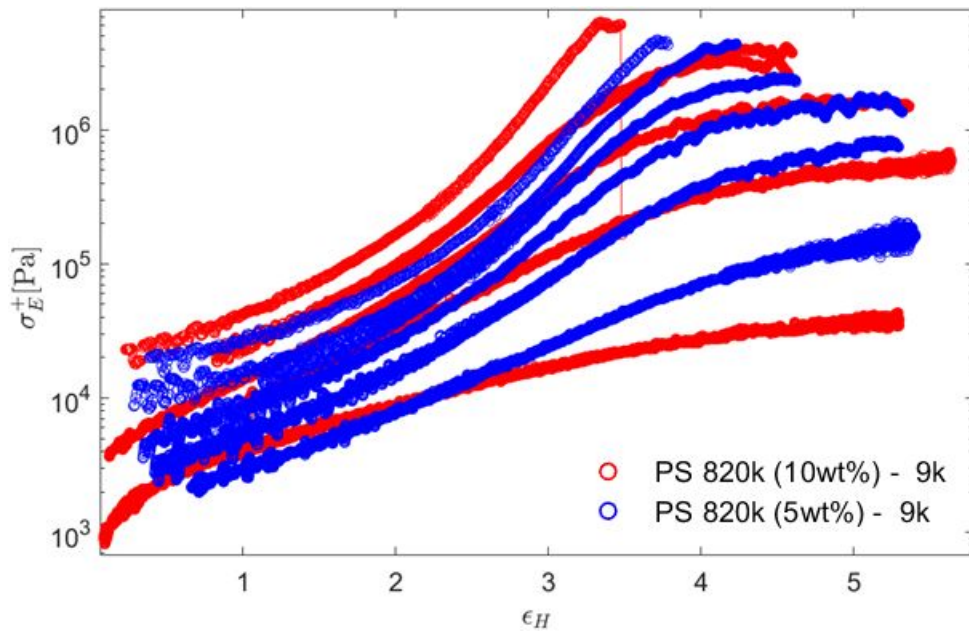

*Figure S2: Measured extensional stress as a function of Hencky strain. Data were measured for different strain rates at  $T = 130^\circ\text{C}$ . The strain rates are from bottom to top  $0.003, 0.01, 0.03, 0.06, 0.09, 0.2 \text{ s}^{-1}$  for PS 820k (10 wt%) and  $0.01, 0.03, 0.06, 0.1, 0.2, 0.3 \text{ s}^{-1}$  for PS 820k (5 wt%). All the data have been subsequently shifted to  $T = T_g + 23.4^\circ\text{C}$ .*

**Figure S3**

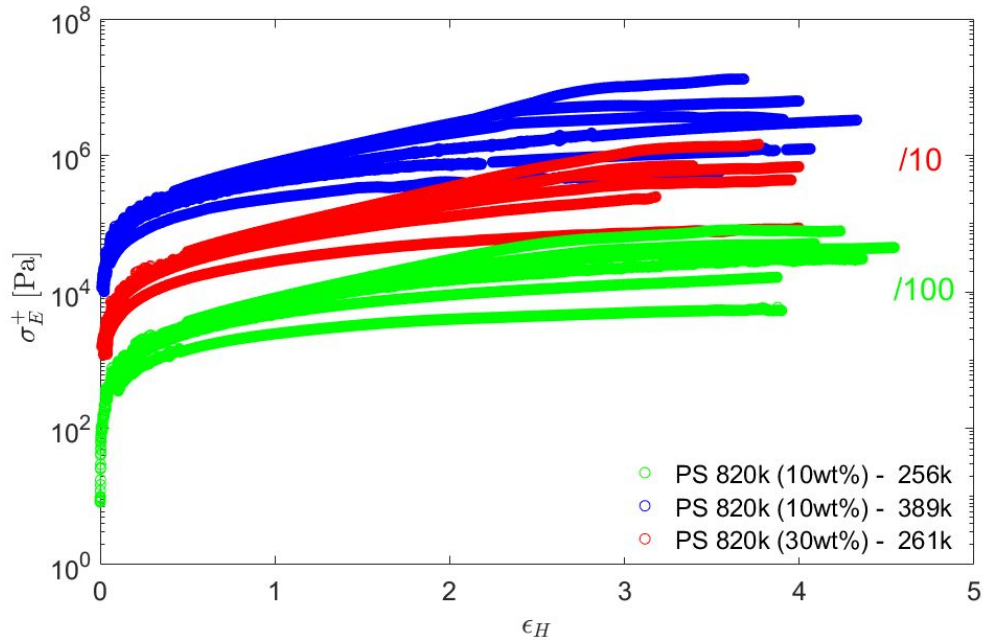

*Figure S3: Measured extensional stress as a function of Hencky strain. Data were measured for different strain rates:  $0.003, 0.01, 0.03, 0.06, 0.09, 0.2 \text{ s}^{-1}$  at  $T = 138^\circ\text{C}$  (or  $T - T_g = 31.4^\circ\text{C}$ ). For clarity, some of the extensional data has been downshifted by 1 or 2 decades.*
